# Supplementary material for: Pathway-selective strategies reveal specific PI3K–mTOR inhibitors as key partners in KRAS G12D-targeted therapy
Source: Research Square preprint supplement (doi:10.21203/rs.3.rs-7614104/v1), 2025-10-06
Supplement: Supplementary file 1 [file 65984ae7e6a59c4696de449f.xlsx]

## Sheet: clusterfeatures-gsetUMAP-gset_t
DB	geneset	sd.X	PDAC002	PDAC044	PDAC060	PDAC087
PATHWAY_WIKI	FGF23 signaling in hypophosphatemic rickets and related disorders_WikiPathways_20230410_WP4790_Homo	0.256	-0.11	-0.36	0.303	0.167
PATHWAY_BIOPLANET	Cyclin A/B1-associated events during G2/M transition	0.234	-0.004	0.011	0.327	-0.334
PATHWAY_REACTOME	GRB2 Events In ERBB2 Signaling R-HSA-1963640	0.216	0.07	-0.181	0.323	-0.212
GENE_PERT_GEO	ERBB3 OE human GSE37009 sample 2741 (up)	0.211	-0.032	0.149	0.214	-0.331
PATHWAY_REACTOME	Signaling By ERBB2 TMD/JMD Mutants R-HSA-9665686	0.205	0.125	-0.178	0.271	-0.217
PATHWAY_REACTOME	RAF-independent MAPK1/3 Activation R-HSA-112409	0.194	-0.06	-0.237	0.302	-0.006
PATHWAY_REACTOME	G1/S-Specific Transcription R-HSA-69205	0.095	-0.097	0.117	0.07	-0.09
GEO_HUMAN	Mtorc2 Rac1 Predisposes Idh1-Mutated GSE147223 2	0.182	0.015	0.063	0.211	-0.29
PATHWAY_WIKI	ERK pathway in Huntington's disease_WikiPathways_20230410_WP3853_Homo sapiens	0.182	0.056	-0.078	0.259	-0.237
PATHWAY_REACTOME	FGFR2 Ligand Binding And Activation R-HSA-190241	0.181	-0.282	-0.008	0.213	0.077
PATHWAY_BIOPLANET	G1/S-specific transcription	0.174	-0.097	0.059	0.251	-0.212
GENE_PERT_GEO	Erbb3 drugactivation mouse GSE21463 sample 1899 (up)	0.173	0.009	0.092	0.179	-0.28
PATHWAY_BIOPLANET	PERK-regulated gene expression	0.167	-0.15	-0.091	0.281	-0.04
PATHWAY_REACTOME	Cyclin A/B1/B2 Associated Events During G2/M Transition R-HSA-69273	0.166	-0.004	-0.038	0.254	-0.212
PATHWAY_REACTOME	RAF Activation R-HSA-5673000	0.16	-0.039	-0.237	0.194	0.083
GENE_PERT_GEO	EGFR OE human GSE3542 sample 194 (up)	0.156	-0.065	-0.109	0.269	-0.096
GENE_PERT_GEO	EGFR drugactivation human GSE22288 sample 1876 (up)	0.156	0.011	0.058	0.18	-0.248
PATHWAY_BIOPLANET	G2/M checkpoints	0.154	-0.031	0.032	0.215	-0.217
DRUG_GEO	FGFR-specific PD173074 inhibitor 1401 human GSE52452 sample 3244 (down)	0.149	-0.229	0.061	0.182	-0.014
PATHWAY_REACTOME	PERK Regulates Gene Expression R-HSA-381042	0.146	-0.177	-0.005	0.228	-0.046
PATHWAY_REACTOME	Paradoxical Activation Of RAF Signaling By Kinase Inactive BRAF R-HSA-6802955	0.145	-0.115	-0.165	0.189	0.091
PATHWAY_REACTOME	ERBB2 Regulates Cell Motility R-HSA-6785631	0.143	0.014	-0.089	0.226	-0.151
PATHWAY_REACTOME	SHC1 Events In ERBB2 Signaling R-HSA-1250196	0.14	0.058	-0.08	0.196	-0.174
PATHWAY_BIOPLANET	AKT signaling pathway	0.137	0.003	-0.188	0.198	-0.012
PATHWAY_BIOPLANET	Inactivation of GSK3 by Akt causes accumulation of beta-catenin in alveolar macrophages	0.134	0.07	-0.137	0.184	-0.117
GENE_PERT_GEO	BRAF overexpression human GSE46801 sample 1951 (up)	0.133	-0.043	-0.058	0.225	-0.125
HALLMARK	G2M_CHECKPOINT	0.13	0.051	0.062	0.11	-0.222
PATHWAY_REACTOME	Signaling By RAF1 Mutants R-HSA-9656223	0.127	-0.112	-0.132	0.172	0.072
MCF7	PTTG1 siRNA GSE48928 mcf7346 (up)	0.126	-0.068	-0.148	0.192	0.024
PATHWAY_REACTOME	Negative Regulation Of MAPK Pathway R-HSA-5675221	0.125	0.011	-0.177	0.175	-0.008
PATHWAY_BIOPLANET	APC/C activator regulation between G1/S and early anaphase	0.124	0.036	-0.015	0.162	-0.184
PATHWAY_REACTOME	PI3K Events In ERBB2 Signaling R-HSA-1963642	0.123	0.072	-0.083	0.162	-0.151
GENE_PERT_GEO	FGFR3 KD human GSE41035 sample 1020 (up)	0.122	-0.129	0.004	0.195	-0.07
GENE_PERT_GEO	ERBB2 OE human GSE43730 sample 358 (down)	0.119	-0.13	0.069	0.158	-0.097
KINASE_GEO	EGFR drugactivation 30 GDS4361 (up)	0.118	-0.106	0.049	0.171	-0.114
PATHWAY_REACTOME	G0 And Early G1 R-HSA-1538133	0.117	-0.069	0.072	0.149	-0.152
GENE_PERT_GEO	Mapk1 INHIBITION (ERK inhibitor U0126) mouse GSE4739 sample 2429 (up)	0.117	-0.135	-0.062	0.18	0.016
KINASE_GEO	FGFR1 mutant 25 GDS4046 (up)	0.111	-0.079	-0.115	0.17	0.025
KINASE_GEO	ERBB2 overexpression 230 GSE14990 (up)	0.11	-0.039	-0.098	0.187	-0.05
GENE_PERT_GEO	ERBB2 OE human GSE43907 sample 2243 (up)	0.108	-0.181	0.06	0.1	0.021
PATHWAY_BIOPLANET	GRB2-SOS provides linkage to MAPK signaling for integrins	0.106	-0.113	-0.086	0.15	0.049
KINASE_GEO	FGFR3 druginhibition 36 GDS5023 (down)	0.104	-0.082	-0.023	0.175	-0.071
KINASE_GEO	BRAF druginhibition 175 GSE42872 (down)	0.103	-0.068	-0.043	0.177	-0.066
KINASE_GEO	BRAF druginhibition 38 GDS5085 (down)	0.103	-0.068	-0.043	0.177	-0.066
KINASE_PERT	MAPK1 knockdown 96h A375 (down)	0.097	-0.056	-0.038	0.166	-0.073
KINASE_PERT	EGFR knockdown 96h HCC515 (down)	0.091	-0.075	-0.022	0.154	-0.057
KINASE_PERT	EGFR knockdown 96h MCF7 (down)	0.088	-0.047	-0.018	0.147	-0.082
GENE_PERT_GEO	BRAF Drug human GSE50791 sample 2541 (down)	0.083	-0.066	-0.043	0.142	-0.032
PATHWAY_BIOPLANET	FGFR ligand binding and activation	0.082	-0.086	-0.009	0.134	-0.039

## Sheet: selected_genesets
DB	geneset	sd.X	PDAC002	PDAC044	PDAC060	PDAC087
PATHWAY_WIKI	FGF23 signaling in hypophosphatemic rickets and related disorders_WikiPathways_20230410_WP4790_Homo	0.256	-0.11	-0.36	0.303	0.167
PATHWAY_BIOPLANET	Cyclin A/B1-associated events during G2/M transition	0.234	-0.004	0.011	0.327	-0.334
PATHWAY_REACTOME	GRB2 Events In ERBB2 Signaling R-HSA-1963640	0.216	0.07	-0.181	0.323	-0.212
GENE_PERT_GEO	ERBB3 OE human GSE37009 sample 2741 (up)	0.211	-0.032	0.149	0.214	-0.331
PATHWAY_REACTOME	Signaling By ERBB2 TMD/JMD Mutants R-HSA-9665686	0.205	0.125	-0.178	0.271	-0.217
PATHWAY_REACTOME	RAF-independent MAPK1/3 Activation R-HSA-112409	0.194	-0.06	-0.237	0.302	-0.006
PATHWAY_REACTOME	G1/S-Specific Transcription R-HSA-69205	0.095	-0.097	0.117	0.07	-0.09
GEO_HUMAN	Mtorc2 Rac1 Predisposes Idh1-Mutated GSE147223 2	0.182	0.015	0.063	0.211	-0.29
PATHWAY_WIKI	ERK pathway in Huntington's disease_WikiPathways_20230410_WP3853_Homo sapiens	0.182	0.056	-0.078	0.259	-0.237
PATHWAY_REACTOME	FGFR2 Ligand Binding And Activation R-HSA-190241	0.181	-0.282	-0.008	0.213	0.077
PATHWAY_BIOPLANET	G1/S-specific transcription	0.174	-0.097	0.059	0.251	-0.212
GENE_PERT_GEO	Erbb3 drugactivation mouse GSE21463 sample 1899 (up)	0.173	0.009	0.092	0.179	-0.28
PATHWAY_BIOPLANET	PERK-regulated gene expression	0.167	-0.15	-0.091	0.281	-0.04
PATHWAY_REACTOME	Cyclin A/B1/B2 Associated Events During G2/M Transition R-HSA-69273	0.166	-0.004	-0.038	0.254	-0.212
PATHWAY_REACTOME	RAF Activation R-HSA-5673000	0.16	-0.039	-0.237	0.194	0.083
GENE_PERT_GEO	EGFR OE human GSE3542 sample 194 (up)	0.156	-0.065	-0.109	0.269	-0.096
GENE_PERT_GEO	EGFR drugactivation human GSE22288 sample 1876 (up)	0.156	0.011	0.058	0.18	-0.248
PATHWAY_BIOPLANET	G2/M checkpoints	0.154	-0.031	0.032	0.215	-0.217
DRUG_GEO	FGFR-specific PD173074 inhibitor 1401 human GSE52452 sample 3244 (down)	0.149	-0.229	0.061	0.182	-0.014
PATHWAY_REACTOME	PERK Regulates Gene Expression R-HSA-381042	0.146	-0.177	-0.005	0.228	-0.046
PATHWAY_REACTOME	Paradoxical Activation Of RAF Signaling By Kinase Inactive BRAF R-HSA-6802955	0.145	-0.115	-0.165	0.189	0.091
PATHWAY_REACTOME	ERBB2 Regulates Cell Motility R-HSA-6785631	0.143	0.014	-0.089	0.226	-0.151
PATHWAY_REACTOME	SHC1 Events In ERBB2 Signaling R-HSA-1250196	0.14	0.058	-0.08	0.196	-0.174
PATHWAY_BIOPLANET	AKT signaling pathway	0.137	0.003	-0.188	0.198	-0.012
PATHWAY_BIOPLANET	Inactivation of GSK3 by Akt causes accumulation of beta-catenin in alveolar macrophages	0.134	0.07	-0.137	0.184	-0.117
GENE_PERT_GEO	BRAF overexpression human GSE46801 sample 1951 (up)	0.133	-0.043	-0.058	0.225	-0.125
HALLMARK	G2M_CHECKPOINT	0.13	0.051	0.062	0.11	-0.222
PATHWAY_REACTOME	Signaling By RAF1 Mutants R-HSA-9656223	0.127	-0.112	-0.132	0.172	0.072
MCF7	PTTG1 siRNA GSE48928 mcf7346 (up)	0.126	-0.068	-0.148	0.192	0.024
PATHWAY_REACTOME	Negative Regulation Of MAPK Pathway R-HSA-5675221	0.125	0.011	-0.177	0.175	-0.008
PATHWAY_BIOPLANET	APC/C activator regulation between G1/S and early anaphase	0.124	0.036	-0.015	0.162	-0.184
PATHWAY_REACTOME	PI3K Events In ERBB2 Signaling R-HSA-1963642	0.123	0.072	-0.083	0.162	-0.151
GENE_PERT_GEO	FGFR3 KD human GSE41035 sample 1020 (up)	0.122	-0.129	0.004	0.195	-0.07
GENE_PERT_GEO	ERBB2 OE human GSE43730 sample 358 (down)	0.119	-0.13	0.069	0.158	-0.097
KINASE_GEO	EGFR drugactivation 30 GDS4361 (up)	0.118	-0.106	0.049	0.171	-0.114
PATHWAY_REACTOME	G0 And Early G1 R-HSA-1538133	0.117	-0.069	0.072	0.149	-0.152
GENE_PERT_GEO	Mapk1 INHIBITION (ERK inhibitor U0126) mouse GSE4739 sample 2429 (up)	0.117	-0.135	-0.062	0.18	0.016
KINASE_GEO	FGFR1 mutant 25 GDS4046 (up)	0.111	-0.079	-0.115	0.17	0.025
KINASE_GEO	ERBB2 overexpression 230 GSE14990 (up)	0.11	-0.039	-0.098	0.187	-0.05
GENE_PERT_GEO	ERBB2 OE human GSE43907 sample 2243 (up)	0.108	-0.181	0.06	0.1	0.021
PATHWAY_BIOPLANET	GRB2-SOS provides linkage to MAPK signaling for integrins	0.106	-0.113	-0.086	0.15	0.049
KINASE_GEO	FGFR3 druginhibition 36 GDS5023 (down)	0.104	-0.082	-0.023	0.175	-0.071
KINASE_GEO	BRAF druginhibition 175 GSE42872 (down)	0.103	-0.068	-0.043	0.177	-0.066
KINASE_GEO	BRAF druginhibition 38 GDS5085 (down)	0.103	-0.068	-0.043	0.177	-0.066
KINASE_PERT	MAPK1 knockdown 96h A375 (down)	0.097	-0.056	-0.038	0.166	-0.073
KINASE_PERT	EGFR knockdown 96h HCC515 (down)	0.091	-0.075	-0.022	0.154	-0.057
KINASE_PERT	EGFR knockdown 96h MCF7 (down)	0.088	-0.047	-0.018	0.147	-0.082
GENE_PERT_GEO	BRAF Drug human GSE50791 sample 2541 (down)	0.083	-0.066	-0.043	0.142	-0.032
PATHWAY_BIOPLANET	FGFR ligand binding and activation	0.082	-0.086	-0.009	0.134	-0.039
