# Supplementary material for: Pathway-selective strategies reveal specific PI3K–mTOR inhibitors as key partners in KRAS G12D-targeted therapy
Source: Research Square preprint supplement (doi:10.21203/rs.3.rs-7614104/v1), 2025-10-06
Supplement: Supplementary file 2 [file 8739a44847230910731de53e.xlsx]

## Sheet: TKI_Summary
Compound	MoA	Primary Target(s)
ASTX029	Dual MAPK‑ERK pathway inhibitor	ERK1/2
Afatinib	Irreversible EGFR/HER2 tyrosine kinase inhibitor	EGFR (ErbB1), HER2 (ErbB2)
Anlotinib	Multi-targeted RTK inhibitor	VEGFR, FGFR, PDGFR, c-Kit, RET
Buparlisib	Pan–class I PI3K inhibitor	p110α/β/γ/δ
Dabrafenib	Mutant BRAF kinase inhibitor	BRAF^V600E/K
MK‑2206	Allosteric AKT inhibitor	AKT1/2/3
Nintedanib	Multi-kinase inhibitor	VEGFR1–3, PDGFRα/β, FGFR1–3, and others
Palbociclib	Selective CDK4/6 inhibitor	CDK4, CDK6
Ponatinib	Multi-kinase inhibitor	BCR-ABL, VEGFR, FGFR, PDGFR, KIT, others
Ravoxertinib	Selective ERK1/2 inhibitor	ERK1, ERK2
Sitravatinib	Multi-kinase inhibitor	TAM, VEGFR, MET, PDGFR, DDR2
Sorafenib	Multi-kinase inhibitor	RAF, VEGFR, PDGFR, KIT, FLT-3
Trametinib	MEK1/2 allosteric inhibitor	MEK1, MEK2
Everolimus	mTORC1 allosteric inhibitor	mTORC1
Paxalisib	Dual PI3K/mTOR inhibitor (CNS‑penetrant)	Class I PI3K + mTOR complexes

## Sheet: PI3K_Inhibitors_Summary
Compound	MoA	Primary Target(s)
Alpelisib	PI3Kα-selective inhibitor	p110α
Idelalisib	PI3Kδ-selective inhibitor	p110δ
Duvelisib	PI3Kδ/γ inhibitor	p110δ, p110γ
Eganelisib	PI3Kγ-selective inhibitor	p110γ
AS605240	PI3Kγ-selective inhibitor	p110γ ≫ α/β/δ
Taselisib	PI3Kα/δ inhibitor, mutant-selective	p110α, p110δ (mutant-sparing)
TGX221	PI3Kβ-selective inhibitor	p110β
Umbralisib	PI3Kδ inhibitor + CK1ε	p110δ, CK1ε
Inavolisib	PI3Kα-selective, mutant-degrader	p110α
AMG511	Pan–class I PI3K inhibitor	p110α/β/γ/δ
Pictilisib	Pan–class I PI3K inhibitor	p110α/β/γ/δ
Buparlisib	Pan–class I PI3K inhibitor	p110α/β/γ/δ
ZSTK474	Pan–class I PI3K inhibitor	p110α/β/γ/δ
LY294002	Pan–class I PI3K inhibitor, also affects GSK3, CK2	PI3K (non-selective) + off-targets
NSC781406	Pan–PI3K (likely non-selective)	PI3K
PI3KIN31	Research-grade pan–PI3K inhibitor	PI3K
PI103	Pan–PI3K (often used in research)	PI3K (class I)
Gilmelisib	Likely PI3Kγ-selective (possible confusion with IPI-549)	p110γ
AZD8186	Dual PI3Kβ/δ inhibitor	p110β, p110δ
Pilaralisib	Dual PI3Kα/δ inhibitor	p110α, p110δ
SAR405	Selective PI3K type III inhibitor	VPS34 (PI3K class III)
Apitolisib	Dual PI3K/mTOR inhibitor	Class I PI3K + mTOR
Bimiralisib	Dual PI3K/mTOR inhibitor	Class I PI3K + mTOR
Paxalisib	Dual PI3K/mTOR inhibitor (CNS-penetrant)	Class I PI3K + mTOR
Gedatolisib	Dual PI3K/mTOR inhibitor	Class I PI3K + mTOR
Omipalisib	Dual PI3K/mTOR inhibitor	Class I PI3K + mTOR
Voxtalisib	Dual PI3K/mTOR inhibitor	Class I PI3K + mTOR
PF04691502	Dual PI3K/mTOR inhibitor	Class I PI3K + mTOR
GSK1059615	Dual PI3K/mTOR inhibitor	Class I PI3K + mTOR
ETP45658	Dual PI3K/mTOR inhibitor	Class I PI3K + mTOR
VS5584	Dual PI3K/mTOR inhibitor	Class I PI3K + mTOR
Samotolisib	PI3K/mTOR + DNA-PK inhibitor	Class I PI3K + mTOR + DNA-PK
PQR530	Dual PI3K/mTOR inhibitor (same as Bimiralisib)	Class I PI3K + mTOR
PI3K/mTOR Inhibitor 2	Dual PI3K/mTOR research compound	Class I PI3K + mTOR
